# Supplementary material for: An Update on Adipose‐Derived Stem Cells for Regenerative Medicine: Where Challenge Meets Opportunity
Source: PubMed Central journal article supplement (PMC10369252; doi:10.1002/advs.202207334), 2023-05-10
Supplement: ADVS-10-2207334-s001.pdf [file ADVS-10-2207334-s001.pdf]

## Supporting Information

for *Adv. Sci.*, DOI 10.1002/adv.202207334

An Update on Adipose-Derived Stem Cells for Regenerative Medicine: Where Challenge Meets Opportunity

*Yi Qin, Gaoran Ge, Peng Yang, Liangliang Wang, Yusen Qiao, Guoqing Pan, Huilin Yang, Jiaxiang Bai\*, Wenguo Cui\* and Dechun Geng\**

*Supporting Information*

**An Update on Adipose-derived Stem Cells for Regenerative  
Medicine: Where Challenge Meets Opportunity**

*Yi Qin, Gaoran Ge, Peng Yang, Liangliang Wang, Yusen Qiao, Guoqing Pan,  
Huilin Yang, Jiaxiang Bai\*, Wenguo Cui\*, Dechun Geng\**

Y. Qin, G. Ge, P. Yang, Y. Qiao, Prof. H. Yang, J. Bai, Prof. D. Geng

Department of Orthopaedics, The First Affiliated Hospital of Soochow University; Orthopaedic Institute, Medical College, Soochow University, Suzhou, 215006, Jiangsu, China.

E-mail: jxbai1995@163.com (J. Bai); szgengdc@suda.edu.cn (D. Geng)

L. Wang

Department of Orthopaedics, The Affiliated Changzhou No. 2 People's Hospital of Nanjing Medical University, Changzhou, 213000, Jiangsu, China.

Prof. G. Pan

Institute for Advanced Materials, School of Materials Science and Engineering, Jiangsu University, Zhenjiang, 212013, Jiangsu, China.

Prof. W. Cui

Department of Orthopaedics, Shanghai Key Laboratory for Prevention and Treatment of Bone and Joint Diseases, Shanghai Institute of Traumatology and Orthopaedics, Ruijin Hospital, Shanghai Jiao Tong University School of Medicine, Shanghai, 200025, China.

E-mail: wgcui@sjtu.edu.cn

**Y. Qin, G. Ge and P. Yang** contributed equally to this work

**Table S1.** Recent Preclinical Studies of ADSCs for Regenerative Therapies.

| Application          | Models                                         | Methods                                                                                                                                        | Results                                                                                                            | Reference |
|----------------------|------------------------------------------------|------------------------------------------------------------------------------------------------------------------------------------------------|--------------------------------------------------------------------------------------------------------------------|-----------|
| <b>Fat grafting</b>  | A fat graft TLR4(-/-) and Nrf2(-/-) mice model | ADSCs were implanted with adipose tissue                                                                                                       | ADSCs increased the survival rate of fat grafts via crosstalk between the Nrf2 and TLR4 pathways                   | [1]       |
|                      | A fat graft nude mice model                    | ADSCs were transfected with modRNA encoding VEGF and co-transplanted with human fat                                                            | ADSC <sup>modVEGF</sup> enhanced angiogenesis and long-term graft survival                                         | [2]       |
|                      | A fat graft nude mice model                    | CD34+CD146+ ADSCs subpopulation with enhanced angiogenic potential were isolated and co-transplanted with adipose tissue                       | Fat enriched CD34+CD146+ ADSCs exhibited improved survival rate with increased expression of proangiogenic factors | [3]       |
| <b>Wound healing</b> | A mouse full-thickness skin defect model       | Mice were divided into three groups and received ADSCs by topical application, intravenous injection, and intramuscular injection respectively | ADSCs accelerated wound healing independent of their techniques for administration                                 | [4]       |
|                      | A rat full-thickness skin defect model         | ADSCs administered systemically into the vein or locally around the wound                                                                      | ADSCs administered by intravenous injection promoted wound healing without homing to the wound bed                 | [5]       |

---

|                          |                                      |                                                                                              |                                                                                                                                            |      |
|--------------------------|--------------------------------------|----------------------------------------------------------------------------------------------|--------------------------------------------------------------------------------------------------------------------------------------------|------|
|                          | A rat diabetic wound model           | ADSCs were incorporated into PRP and injected subcutaneously                                 | ADSCs combined with PRP induced a higher wound closure rate with enhanced neovascularization                                               | [6]  |
|                          | A rat diabetic wound model           | ADSCs were preconditioned with PBM and grafted into the wound                                | ADSCs preconditioned with PBM significantly promoted the wound healing both in vitro and in vivo                                           | [7]  |
|                          | An ovine burn wound model            | ADSCs were administered into grafted burn wound locally                                      | ADSCs ameliorated grafted burn wound healing and accelerated wound bed blood flow with higher VEGF expression                              | [8]  |
|                          | A mouse healing-impaired wound model | ADSCs sheets were fabricated through stimulation with L-ascorbate 2-phosphate                | ADSC sheets promoted wound healing with reduced scar formation                                                                             | [9]  |
| <b>Bone regeneration</b> | A mouse femoral fracture model       | ADSCs were transduced to express FGF and injected to fracture sites                          | ADSCs overexpressing FGF accelerated fracture healing by facilitating the remodeling of collagen into mineralized callus                   | [10] |
|                          | A mouse tibial infection model       | ADSCs were administered into bone defect area after sufficient debridement of infected bones | ADSCs restored bone regeneration after osteomyelitis via upregulation of osteoblastogenesis, and downregulation of B cells and osteoclasts | [11] |
|                          | A rat radial defect model            | ADSCs were transplanted with HDB                                                             | ADSCs-HDB composites showed a strong osteogenic ability                                                                                    | [12] |

---

---

|                               |                                |                                                                                                                         |                                                                                                                                                                                                    |      |
|-------------------------------|--------------------------------|-------------------------------------------------------------------------------------------------------------------------|----------------------------------------------------------------------------------------------------------------------------------------------------------------------------------------------------|------|
|                               | A rat femoral defect model     | Osteogenically induced ADSCs were combined with MBG scaffolds prevascularized by seeding with endothelial-induced ADSCs | The strategy of time-phase sequential utilization of ADSCs on MBG scaffolds promoted better bone formation                                                                                         | [13] |
|                               | A mouse calvarial defect model | ADSCs were assembled with PDGF and biomineral coated fibers to form spheroids and implanted into defect area            | ADSCs spheroids incorporating PDGF and biominerals exhibited greater endothelial lineage mRNA expression and osteogenic capability                                                                 | [14] |
|                               | A mouse calvarial defect model | ADSCs were assembled with adenosine and polydopamine coated fibers to form spheroids and implanted to defect area       | ADSCs spheroids impregnated with engineered fibers can enable adenosine delivery and promote bone regeneration with enhanced osteogenic differentiation.                                           | [15] |
| <b>Skeletal muscle repair</b> | A rat muscle injury model      | ADSCs were pretreated with IL-4 and SDF-1 and transplanted into injured muscles                                         | Cytokine-pretreated ADSCs showed an increased ability to improve skeletal muscle regeneration                                                                                                      | [16] |
|                               | A mouse muscle ischemia model  | ADSCs and HIF-1 $\alpha$ -silenced ADSCs were intramuscularly injected into the ischemic muscle                         | ADSCs promoted ischemic muscle regeneration by inducing M2 macrophage polarization via the HIF-1 $\alpha$ /IL-10 pathway, while the therapeutic effect decreased in HIF-1 $\alpha$ -silenced ADSCs | [17] |

---

---

|                              |                                                |                                                                                                                                            |                                                                                                                                        |      |
|------------------------------|------------------------------------------------|--------------------------------------------------------------------------------------------------------------------------------------------|----------------------------------------------------------------------------------------------------------------------------------------|------|
|                              | A mouse muscle injury model                    | ADSC after implantation were tracked by optical projection tomography                                                                      | ADSCs ameliorated skeletal muscle regeneration without direct participation in muscle fiber formation                                  | [18] |
|                              | A rat muscle ischemia-reperfusion injury model | Co-application of ADSCs and ECSW was conducted                                                                                             | ECSW-ADSCs treatment appeared more effective than either treatment alone in skeletal muscle repair                                     | [19] |
|                              | A rabbit anal sphincter injury model           | Co-application of ADSCs and a low-level laser therapy was conducted                                                                        | Laser-ADSCs treatment was superior to either one alone in repair of anal sphincter injury                                              | [20] |
| <b>Tendon reconstruction</b> | A rat achilles excision defect model           | Tenogenically differentiated ADSCs, undifferentiated ADSCs, or hydrogel alone were injected into the achilles excision defect respectively | ADSCs, especially those tenogenically differentiated improved the biomechanical properties of repaired tendon more than hydrogel alone | [21] |
|                              | A rat rotator cuff tear model                  | ADSCs sheets were transplanted to the rotator cuff tear area                                                                               | ADSCs sheets significantly enhanced the biomechanical properties of repaired rotator cuff                                              | [22] |
|                              | A rabbit patellar tendon defect model          | ADSCs sheets stimulated by GDF-5 were combined with nanoyarn scaffolds and implanted into patellar                                         | The GDF-5-induced ADSCs sheets expressed higher tenogenesis-related markers and promoted functional tendon                             | [23] |

---

|                                   |                                     | tendon defect area                                                             | regeneration                                                                                                                                 |      |
|-----------------------------------|-------------------------------------|--------------------------------------------------------------------------------|----------------------------------------------------------------------------------------------------------------------------------------------|------|
| <b>Cartilage<br/>regeneration</b> | A rat osteochondral defect model    | ADSCs were transplanted with an injectable GCS/DF-PEG hydrogel                 | The ADSCs and GCS/DF-PEG hydrogel complexes showed obvious cartilage regeneration                                                            | [24] |
|                                   | A rat osteoarthritis model          | ADSCs were transplanted with an injectable AM hydrogel                         | ADSCs and AM hydrogel exhibited synergistic anti-inflammatory and chondroprotective effects                                                  | [25] |
|                                   | A rabbit osteochondral defect model | ADSCs and IGF-1 were transplanted with coacervate-embedded composite hydrogels | The dual delivery platform was able to induce chondrogenic differentiation of embedded ADSCs and promote cartilage regeneration effectively. | [26] |
|                                   | A rabbit osteochondral defect model | CD146+ ADSCs were combined with ACECM and implanted into defect area           | The CD146+ ADSCs-ACECM composites exhibited an excellent inflammation-modulating property and promoted better cartilage regeneration         | [27] |
|                                   | A pig osteochondral defect model    | ADSCs were combined with ACECM and transplanted into defect area               | The ADSCs-ACECM composites successfully repaired the cartilage defect                                                                        | [28] |
| <b>Cardiac</b>                    | A mouse MI model                    | ADSCs reprogrammed with six transcription factors                              | The reprogrammed ADSCs exhibited higher survival rate and                                                                                    | [29] |

---

|                  |                                                                                             |                                                                                                                                                             |                                                      |      |
|------------------|---------------------------------------------------------------------------------------------|-------------------------------------------------------------------------------------------------------------------------------------------------------------|------------------------------------------------------|------|
| <b>repair</b>    | (Baf60c, Gata4, Gata6, Klf15, Mef2a, and Myocd) were implanted into the infarct border zone | significantly reduced the infarction scar area                                                                                                              |                                                      |      |
| A rat MI model   | ADSCs were transplanted with an injectable conductive hydrogen sulfide-releasing hydrogel   | The ADSCs-loaded conductive hydrogen sulfide-releasing hydrogel system ameliorated the harsh microenvironment and improved the cardiac functions remarkably | [30]                                                 |      |
| A rat MI model   | ADSCs combined with NRG-MPs were injected into the infarct border zone                      | ADSC-NRG-MPs improved cell engraftment and neoangiogenesis, favoring a synergy for inducing overall cardiac remodeling                                      | [31]                                                 |      |
| A rat MI model   | ADSCs and plasmid DNA-eNOs were transplanted with an injectable conductive hydrogel         | The ADSCs-plasmid DNA-hydrogel system increased the expression of eNOs in MI tissue and significantly ameliorated the cardiac functions                     | [32]                                                 |      |
| A mouse MI model | ADSCs were injected into the infarct border zone with CTRP9                                 | CTRP9 promoted ADSCs survival, stimulated ADSCs migration, and attenuated cardiomyocyte cell death                                                          | [33]                                                 |      |
| <b>Nerve</b>     | A rat sciatic nerve injury                                                                  | ADSCs were induced by FGF9 and administered                                                                                                                 | The FGF9-induced ADSCs participated in myelin sheath | [34] |

---



| regeneration                     | model                                                                         | directly                                                                                                                                                         | formation and facilitated axonal regrowth to promote nerve regeneration |  |
|----------------------------------|-------------------------------------------------------------------------------|------------------------------------------------------------------------------------------------------------------------------------------------------------------|-------------------------------------------------------------------------|--|
| A rat sciatic nerve defect model | ADSCs sheets with activation of neurotrophic genes were administered directly | The functionalized ADSCs sheets stimulated axon regeneration, remyelination, and nerve reinnervation                                                             | [35]                                                                    |  |
| A rat sciatic nerve defect model | ADSCs were loaded with pl-CSMCs and injected into NGCs                        | The microcarrier-based ADSCs transplantation improved the repair effect of NGCs effectively                                                                      | [36]                                                                    |  |
| A rat sciatic nerve injury model | ADSCs were loaded with SPIONs and magnetically recruited to the injured site  | Magnetic targeted ADSCs therapy promoted cell recruitment at the injured site and ameliorated recovery over ADSCs treatment alone                                | [37]                                                                    |  |
| A rat spinal cord injury model   | ADSCs were administrated with combination of low-level laser                  | Combination of ADSCs and laser improved motor function recovery, hyperalgesia, and allodynia more than ADSCs alone, with increased number of axons around cavity | [38]                                                                    |  |
| A rat spinal cord injury model   | ADSCs were transplanted with a CaNeu hydrogel                                 | The CaNeu-hydrogel-mediated ADSCs delivery promoted axonal growth and functional repair                                                                          | [39]                                                                    |  |

## Reference

- [1] X. Chen, L. Yan, Z. Guo, Z. Chen, Y. Chen, M. Li, C. Huang, X. Zhang, L. Chen, *Cell Death Dis* **2016**, *7*, e2369.
- [2] F. Yu, N. Witman, D. Yan, S. Zhang, M. Zhou, Y. Yan, Q. Yao, F. Ding, B. Yan, H. Wang, W. Fu, Y. Lu, Y. Fu, *Stem Cell Res Ther* **2020**, *11*, 490.
- [3] M. R. Borrelli, R. A. Patel, C. Blackshear, S. Vistnes, N. M. Diaz Deleon, S. Adem, A. H. Shen, J. Sokol, A. Momeni, D. Nguyen, M. T. Longaker, D. C. Wan, *Stem Cells Translational Medicine* **2020**, *9*, 1389.
- [4] H. Kim, M. R. Hyun, S. W. Kim, *Stem Cells Int* **2019**, 2019, 2745640.
- [5] K. Kallmeyer, D. André-Lévigne, M. Baquié, K.-H. Krause, M. S. Pepper, B. Pittet-Cuénod, A. Modarressi, *Stem Cells Translational Medicine* **2020**, *9*, 131.
- [6] X. Ni, X. Shan, L. Xu, W. Yu, M. Zhang, C. Lei, N. Xu, J. Lin, B. Wang, *Stem Cell Research & Therapy* **2021**, *12*, 226.
- [7] H. Ahmadi, A. Amini, F. Fadaei Fathabady, A. Mostafavinia, F. Zare, R. Ebrahimpour-Malekshah, M. N. Ghalibaf, M. Abrisham, F. Rezaei, R. Albright, S. K. Ghoreishi, S. Chien, M. Bayat, *Stem Cell Research & Therapy* **2020**, *11*, 494.
- [8] O. Fujiwara, A. Prasai, D. Perez-Bello, A. El Ayadi, I. Y. Petrov, R. O. Esenaliev, Y. Petrov, D. N. Herndon, C. C. Finnerty, D. S. Prough, P. Enkhbaatar, *Burns Trauma* **2020**, *8*, tkaa009.
- [9] J. Yu, M. Y. Wang, H. C. Tai, N. C. Cheng, *Acta Biomater* **2018**, *77*, 191.
- [10] H. Zhang, A. Kot, Y.-A. E. Lay, F. A. Fierro, H. Chen, N. E. Lane, W. Yao, *Stem Cells Translational Medicine* **2017**, *6*, 1880.
- [11] J. M. Wagner, F. Reinkemeier, C. Wallner, M. Dadras, J. Huber, S. V. Schmidt, M. Drysch, S. Dittfeld, H. Jaurich, M. Becerikli, K. Becker, N. Rauch, V. Duhan, M. Lehnhardt, B. Behr, *Stem Cells Translational Medicine* **2019**, *8*, 1084.
- [12] J. Liu, P. Zhou, Y. Long, C. Huang, D. Chen, *Stem Cell Research & Therapy* **2018**, *9*, 79.
- [13] J. Du, P. Xie, S. Lin, Y. Wu, D. Zeng, Y. Li, X. Jiang, *ACS Appl Mater Interfaces* **2018**, *10*, 28340.
- [14] J. Lee, S. Lee, T. Ahmad, S. K. Madhurakkat Perikamana, J. Lee, E. M. Kim, H. Shin, *Biomaterials* **2020**, *255*, 120192.
- [15] T. Ahmad, H. Byun, J. Lee, S. K. Madhurakat Perikamana, Y. M. Shin, E. M. Kim, H. Shin, *Biomaterials* **2020**, *230*, 119652.
- [16] M. Zimowska, K. Archacka, E. Brzoska, J. Bem, A. M. Czerwinska, I. Grabowska, P. Kasprzycka, E. Michalczewska, I. Stepaniec, M. Soszynska, K. Ilach, W. Streminska, M. A. Ciemerych, *International Journal of Molecular Sciences* **2020**, *21*.
- [17] J. Liu, P. Qiu, J. Qin, X. Wu, X. Wang, X. Yang, B. Li, W. Zhang, K. Ye, Z. Peng, X. Lu, *Stem Cells (Dayton, Ohio)* **2020**, *38*, 1307.
- [18] A. Gorecka, S. Salemi, D. Haralampieva, F. Moalli, D. Stroka, D. Candinas, D. Eberli, L. Brügger, *Stem Cell Research & Therapy* **2018**, *9*, 195.
- [19] T.-C. Yin, R.-W. Wu, J.-J. Sheu, P.-H. Sung, K.-H. Chen, J. Y. Chiang, S.-K. Hsueh, W.-J. Chung, P.-Y. Lin, S.-L. Hsu, C.-C. Chen, C.-Y. Chen, P.-L. Shao, H.-K. Yip, *Oxid Med Cell Longev* **2018**, 2018, 6012636.
- [20] A. Sarveezad, A. Babahajian, A. Yari, C. K. Rayner, M. Mokhtare, A. Babaei-Ghazani, S. Agah, B. Mahjoubi, J. Shamseddin, M. Yousefifard, *Stem Cell Research & Therapy* **2019**, *10*, 367.
- [21] J. B. Norelli, D. P. Plaza, D. N. Stal, A. M. Varghese, H. Liang, D. A. Grande, *J Tissue Eng* **2018**, *9*, 2041731418811183.
- [22] M. J. Shin, I. K. Shim, D. M. Kim, J. H. Choi, Y. N. Lee, I.-H. Jeon, H. Kim, D. Park, E. Kholinne, H.-S.

- Yang, K. H. Koh, *Am J Sports Med* **2020**, *48*, 3347.
- [23] S. Chen, J. Wang, Y. Chen, X. Mo, C. Fan, *Mater Sci Eng C Mater Biol Appl* **2021**, *119*, 111506.
- [24] J. Yang, X. Jing, Z. Wang, X. Liu, X. Zhu, T. Lei, X. Li, W. Guo, H. Rao, M. Chen, K. Luan, X. Sui, Y. Wei, S. Liu, Q. Guo, *Front Bioeng Biotechnol* **2021**, *9*, 607709.
- [25] M. Bhattacharjee, J. L. Escobar Ivirico, H.-M. Kan, S. Shah, T. Otsuka, R. Bordett, M. Barajaa, N. Nagiah, R. Pandey, L. S. Nair, C. T. Laurencin, *Proc Natl Acad Sci U S A* **2022**, *119*.
- [26] H. Cho, J. Kim, S. Kim, Y. C. Jung, Y. Wang, B.-J. Kang, K. Kim, *J Control Release* **2020**, *327*, 284.
- [27] X. Li, W. Guo, K. Zha, X. Jing, M. Wang, Y. Zhang, C. Hao, S. Gao, M. Chen, Z. Yuan, Z. Wang, X. Zhang, S. Shen, H. Li, B. Zhang, H. Xian, Y. Zhang, X. Sui, L. Qin, J. Peng, S. Liu, S. Lu, Q. Guo, *Theranostics* **2019**, *9*, 5105.
- [28] L. Lu, X. Shang, B. Liu, W. Chen, Y. Zhang, S. Liu, X. Sui, A. Wang, Q. Guo, *Journal of Cellular Physiology* **2021**, *236*, 4244.
- [29] S. Narita, K. Unno, K. Kato, Y. Okuno, Y. Sato, Y. Tsumura, Y. Fujikawa, Y. Shimizu, R. Hayashida, K. Kondo, R. Shibata, T. Murohara, *iScience* **2022**, *25*, 104651.
- [30] W. Liang, J. Chen, L. Li, M. Li, X. Wei, B. Tan, Y. Shang, G. Fan, W. Wang, W. Liu, *ACS Appl Mater Interfaces* **2019**, *11*, 14619.
- [31] P. Díaz-Herráez, L. Saludas, S. Pascual-Gil, T. Simón-Yarza, G. Abizanda, F. Prósper, E. Garbayo, M. J. Blanco-Prieto, *J Control Release* **2017**, *249*, 23.
- [32] W. Wang, B. Tan, J. Chen, R. Bao, X. Zhang, S. Liang, Y. Shang, W. Liang, Y. Cui, G. Fan, H. Jia, W. Liu, *Biomaterials* **2018**, *160*, 69.
- [33] W. Yan, Y. Guo, L. Tao, W. B. Lau, L. Gan, Z. Yan, R. Guo, E. Gao, G. W. Wong, W. L. Koch, Y. Wang, X.-L. Ma, *Circulation* **2017**, *136*, 2162.
- [34] C.-W. Huang, S.-Y. Lu, T.-C. Huang, B.-M. Huang, H. S. Sun, S.-H. Yang, J.-I. Chuang, Y.-Y. Hsueh, Y.-T. Wu, C.-C. Wu, *Theranostics* **2020**, *10*, 2817.
- [35] M.-N. Hsu, H.-T. Liao, V. A. Truong, K.-L. Huang, F.-J. Yu, H.-H. Chen, T. K. N. Nguyen, P. Makarevich, Y. Parfyonova, Y.-C. Hu, *Theranostics* **2019**, *9*, 6099.
- [36] Y. Sun, X. Chi, H. Meng, M. Ma, J. Wang, Z. Feng, Q. Quan, G. Liu, Y. Wang, Y. Xie, Y. Zheng, J. Peng, *Bioactive Materials* **2021**, *6*, 3987.
- [37] P. A. Soto, M. Vence, G. M. Piñero, D. F. Coral, V. Usach, D. Muraca, A. Cueto, A. Roig, M. B. F. van Raap, C. P. Setton-Avruij, *Acta Biomaterialia* **2021**, *130*, 234.
- [38] A. Sarveazad, A. Janzadeh, G. Taheripak, S. Dameni, M. Yousefifard, F. Nasirinezhad, *Stem Cell Research & Therapy* **2019**, *10*, 183.
- [39] X. Yuan, W. Yuan, L. Ding, M. Shi, L. Luo, Y. Wan, J. Oh, Y. Zhou, L. Bian, D. Y. B. Deng, *Biomaterials* **2021**, *279*, 121190.
